# Supplementary material for: OpenSAFELY: impact of national guidance on switching anticoagulant therapy during COVID-19 pandemic
Source: HighWire-hosted journal article supplement (doi:10.1136/openhrt-2021-001784), 2021-11-01
Supplement: openhrt-2021-001784supp001_data_supplement.pdf [file openhrt-2021-001784supp001_data_supplement.pdf]

## OpenSAFELY: impact of national guidance on switching anticoagulant therapy during COVID-19 pandemic

### Supplementary material

**Table S1:** Patient count and test count for high INR results per month of 2020, rounded to the nearest 10.

|                      |                 | <b>8 exactly</b> | <b>over 8</b> | <b>Total (≥8)</b> |
|----------------------|-----------------|------------------|---------------|-------------------|
| <b>Patient count</b> | <b>Jan 2020</b> | 160              | 260           | <b>420</b>        |
|                      | <b>Feb 2020</b> | 120              | 160           | <b>280</b>        |
|                      | <b>Mar 2020</b> | 120              | 200           | <b>320</b>        |
|                      | <b>Apr 2020</b> | 190              | 280           | <b>470</b>        |
|                      | <b>May 2020</b> | 110              | 150           | <b>260</b>        |
|                      | <b>Jun 2020</b> | 70               | 140           | <b>210</b>        |
|                      | <b>Jul 2020</b> | 90               | 130           | <b>220</b>        |
|                      | <b>Aug 2020</b> | 60               | 110           | <b>170</b>        |
|                      | <b>Sep 2020</b> | 80               | 140           | <b>220</b>        |
| <b>Test count</b>    | <b>Jan 2020</b> | 200              | 310           | <b>510</b>        |
|                      | <b>Feb 2020</b> | 160              | 190           | <b>350</b>        |
|                      | <b>Mar 2020</b> | 160              | 240           | <b>400</b>        |
|                      | <b>Apr 2020</b> | 250              | 340           | <b>590</b>        |
|                      | <b>May 2020</b> | 130              | 180           | <b>310</b>        |
|                      | <b>Jun 2020</b> | 90               | 180           | <b>270</b>        |
|                      | <b>Jul 2020</b> | 110              | 160           | <b>270</b>        |
|                      | <b>Aug 2020</b> | 80               | 120           | <b>200</b>        |
|                      | <b>Sep 2020</b> | 100              | 170           | <b>270</b>        |

**Table S2:** Patients issued warfarin and DOAC scripts on the same day. Values below 5 are shown as “1-5”.

| Month           | Warfarin and DOAC issued same day | One ended same day |
|-----------------|-----------------------------------|--------------------|
| Jan 2019        | 93                                | 1-5                |
| Feb 2019        | 78                                | 1-5                |
| Mar 2019        | 78                                | 1-5                |
| Apr 2019        | 87                                | 1-5                |
| May 2019        | 79                                | 1-5                |
| Jun 2019        | 74                                | 1-5                |
| Jul 2019        | 79                                | 1-5                |
| Aug 2019        | 64                                | 1-5                |
| Sep 2019        | 70                                | 1-5                |
| Oct 2019        | 58                                | 0                  |
| Nov 2019        | 52                                | 1-5                |
| Dec 2019        | 65                                | 1-5                |
| Jan 2020        | 85                                | 1-5                |
| Feb 2020        | 64                                | 1-5                |
| <b>Mar 2020</b> | <b>214</b>                        | 10                 |
| <b>Apr 2020</b> | <b>246</b>                        | 11                 |
| May 2020        | 187                               | 7                  |
| Jun 2020        | 122                               | 1-5                |
| Jul 2020        | 95                                | 31                 |
| Aug 2020        | 81                                | 28                 |

**Table S3:** Number of patients included in regression for factors associated with switching from warfarin to a DOAC during the pandemic, stratified by the outcome of whether the patient was switched to a DOAC.

| Factor                     |                   | DOAC switched? |        |
|----------------------------|-------------------|----------------|--------|
|                            |                   | No             | Yes    |
| All patients               | <i>N</i> =149,243 | 129,336        | 19,907 |
| Age                        | Under 65          | 25,327         | 1,731  |
|                            | 65 to 74          | 33,291         | 4,579  |
|                            | 75 and over       | 70,718         | 13,597 |
| Ethnicity                  | Unknown           | 37,086         | 5,733  |
|                            | White             | 88,751         | 13,871 |
|                            | Mixed             | 309            | 25     |
|                            | South Asian       | 1,910          | 159    |
|                            | Black             | 733            | 67     |
|                            | Other             | 547            | 52     |
| IMD                        | Least deprived    | 26,610         | 3,331  |
|                            | I                 | 25,934         | 3,846  |
|                            | I                 | 25,920         | 4,390  |
|                            | I                 | 25,238         | 4,132  |
|                            | Most deprived     | 25,634         | 4,208  |
| Care home                  | No                | 127,993        | 19,621 |
|                            | Yes               | 1,343          | 286    |
| Atrial fibrillation        | No                | 44,792         | 3,577  |
|                            | Yes               | 84,544         | 16,330 |
| eGFR                       | ≥60               | 43,872         | 2,830  |
|                            | Not measured      | 44,491         | 7,562  |
|                            | 30-59             | 26,748         | 5,071  |
|                            | <30               | 3,965          | 435    |
|                            | Other recent RFT  | 10,260         | 4,009  |
| Number of recent INR tests | 0                 | 23,552         | 2,303  |
|                            | 1-3               | 53,250         | 7,631  |
|                            | 4-6               | 30,412         | 5,785  |
|                            | 7+                | 22,122         | 4,188  |

|                                 |            |         |        |
|---------------------------------|------------|---------|--------|
| Length of warfarin prescription | <= 2 years | 6,066   | 572    |
|                                 | 2-6 years  | 30,917  | 4,847  |
|                                 | 6-8 years  | 24,464  | 4,322  |
|                                 | >8 years   | 67,889  | 10,166 |
| Previous DOAC prescription      | No         | 122,406 | 19,148 |
|                                 | Yes        | 6,930   | 759    |
| DOAC contraindication           | No         | 128,804 | 19,870 |
|                                 | Yes        | 532     | 37     |
